# Supplementary material for: The fitness cost and benefit of phase‐separated protein deposits
Source: PubMed Central journal article supplement (PMC6452874; doi:10.15252/msb.20178075), 2019-04-08
Supplement: MSB-15-e8075-s001.pdf [file MSB-15-e8075-s001.pdf]

# The fitness cost and benefit of protein phase separated protein deposits

Natalia Sanchez de Groot<sup>1,2,3,†\*</sup>, Marc Torrent Burgas<sup>1,4†</sup>, Charles N. J. Ravarani<sup>1</sup>, Ala Trusina<sup>5</sup>, Salvador Ventura<sup>6</sup>, M. Madan Babu<sup>1,\*</sup>

<sup>1</sup>MRC Laboratory of Molecular Biology, Francis Crick Avenue, Cambridge, CB2 0QH, UK

<sup>2</sup>Bioinformatics and Genomics Programme, Centre for Genomic Regulation (CRG), Dr. Aiguader 88, 08003

<sup>3</sup>Universitat Pompeu Fabra (UPF), Barcelona, Spain

<sup>4</sup>Systems Biology of Infection Lab, Department of Biochemistry and Molecular Biology, Universitat Autònoma de Barcelona, 08193, Barcelona, Spain

<sup>5</sup>Niels Bohr Institute, University of Copenhagen, Copenhagen, Denmark

<sup>6</sup>Institut de Biotecnologia i Biomedicina and Departament de Bioquímica i Biologia Molecular, Universitat Autònoma de Barcelona, 08193-Bellaterra (Barcelona), Spain

<sup>†</sup>Both authors contributed equally

\* Correspondence: [natalia.sanchez@crg.eu](mailto:natalia.sanchez@crg.eu) (N.S.G.), [madanm@mrc-lmb.cam.ac.uk](mailto:madanm@mrc-lmb.cam.ac.uk) (M.M.B.)

## Appendix

### **Table of contents**

|                                                                                                                                                                   |    |
|-------------------------------------------------------------------------------------------------------------------------------------------------------------------|----|
| <b>Vectors and Primers</b>                                                                                                                                        | 2  |
| <b>Appendix Table S1.</b> List of data measured for each strain, growth media and environment.                                                                    | 6  |
| <b>Appendix Table S2.</b> List of doubling times measured for each strain, growth media and environment.                                                          | 7  |
| <b>Appendix Table S3.</b> Time required to reach 50% of the population in (simulated) alternating environments.                                                   | 8  |
| <b>Appendix Figure S1.</b> Domain organization of proteins that can undergo phase separation and form functional deposits in vivo                                 | 11 |
| <b>Appendix Figure S2.</b> Variation in fluorescence depending on the strain and the concentration of inducer.                                                    | 13 |
| <b>Appendix Figure S3.</b> Cell area vs. foci size distribution for URA3 <sub>agg</sub> cells grown in different environments when Ura3p is non-essential (+URA). | 17 |
| <b>Appendix References</b>                                                                                                                                        | 19 |

## Vectors and Primers

### TRP start sequence

(The regions homologous to TRP1 are indicated in bold)

5' GGCGCGCCGCGGCCGCGATATC**GAGGGCATTGGTGACTATTGAGCACGTGAGTATACGTGATTAAGCACACAA**  
**AGGCAGCTTGGAGT**CTCGAGGCGAGACGTCATCGAAGCTTACCGACTAGTACGAGAGCTCAGCCATGCATGCGAG  
AATTC**AAATGGCGTTATTGGTGTGGATGTAAGCGGAGGTGTGGAGACAAATGGTGTAAAAGACTCTAACAGCTAG**  
CGCCGGCGGTACC 3'

### Restriction map of TRP start

```

                                     SacII
                                     BssHII NotI
                                     AscI   EagI   EcoRV
1  CGAATTGGCGGAAGGCCGTCAAGGCCACGTGTCTTGTCCAGGCGCGCCGCGGCCGCGATA
   -----+-----+-----+-----+-----+-----+
   GCTTAACCGCCTTCCGGCAGTTCCGGTGCACAGAACAGGTCCGCGCGGCCGCGGCGCTAT

                                     AccI
61  TCGAGGGCATTGGTGACTATTGAGCACGTGAGTATACGTGATTAAGCACACAAAGGCAGC
   -----+-----+-----+-----+-----+
   AGCTCCCCTAACCACTGATAACTCGTGCACCTCATATGCACTAATTCGTGTGTTTCCGTCG

           BsmBI
           XhoI   AatII   HindIII   SpeI   SacI   NsiI
121  TTGAGTCTCGAGGCGAGACGTCATCGAAGCTTACCGACTAGTACGAGAGCTCAGCCATG
   -----+-----+-----+-----+-----+
   AACCTCAGAGCTCCGCTCTGCAGTAGCTTCGAATGGCTGATCATGCTCTCGAGTCGGTAC

           EcoRI
181  CATGCGAGAATTCAAATGGCGTTATTGGTGTGGATGTAAGCGGAGGTGTGGAGACAAATG
   -----+-----+-----+-----+-----+
   GTACGCTCTTAAGTTTACCGCAATAACCACAACCTACATTCGCCTCCACACCTCTGTTTAC

           NheI   NaeI   KpnI   PacI
241  GTGTAAGACTCTAACAGCTAGCGCCGGGTACCTTAATTAATGGAGCACAAAGACTGG
   -----+-----+-----+-----+-----+
   CACATTTTCTGAGATTGTCGATCGCGGCCCATGGAATTAATTACCTCGTGTCTGACC

301  CCTCATGGGCCTTCCGCTCACTGC
   -----+-----+-----
   GGAGTACCCGGAAGGCGAGTGACG
```

## Fragment of TRP-URA

5' muticloning site and barcode: 1 - 130  
GAL1 promoter: 131 - 595 (blue)  
URA3 gene: 602 - 1402 (green)  
Linker 1: 1403 - 1438  
GFP gene: 1439 - 2155 (violet)  
TEF terminator: 2163 - 2392 (red)  
SpHis5 marker cassette: 2782 - 3668 (orange)  
3' muticloning site and barcode: 3669 - 3813

5 ' GGCGCGCCGCGGCCGCGATATCGAGGGCATTGGTGACTATTGAGCACGTGAGTATACGTG  
ATTAAGCACACAAAGGCAGCTTGGAGTCTCGAGCGTTGATGCTCTACAAGATGCCGTGCTGC  
AGAAGCTTTGAAGTACGGATTAGAAGCCGCCGAGCGGGTGACAGCCCTCCGAAGGAAGACTC  
TCCTCCGTGCGTCTTCGTTCCACCGTTCGCGTTCTGAAACGCAGATGTGCCTCGCGCCGC  
ACTGCTCCGAACAATAAAGATTCTACAATACTAGCTTTTATGGTTATGAAGAGGAAAATTG  
GCAGTAACCTGGCCCCACAAACCTTCAAATGAACGAATCAAATTAACAACCATAGGATGATA  
ATGCGATTAGTTTTTTAGCCTTATTTCTGGGGTAATTAATCAGCGAAGCGATGATTTTTGAT  
CTATTAACAGATATATAAATGCAAAAACCTGCATAACCCTTTAACTAATACTTTCAACATTT  
TCGGTTTGTATTACTTCTTATTCAAATGTAATAAAAGTATCAACAAAAAATTGTTAATATAC  
CTCTATACTTTAACGTCAAGGAGAAAAAACCCCGGATCCGTCGACATGTCGAAAGCTACATA  
TAAGGAACGTGCTGCTACTCATCCTAGTCTGTTGCTGCCAAGCTATTTAATATCATGCACG  
AAAAGCAAACAACTTGTGTGCTTCATTGGATGTTTCGTACCACCAAGGAATTACTGGAGTTA  
GTTGAAGCATTAGGTCCCAAATTTGTTTACTAAAAACACATGTGGATATCTTGACTGATTT  
TTCCATGGAGGGCACAGTTAAGCCGCTAAAGGCATTATCCGCCAAGTACAATTTTTTACTCT  
TCGAAGACAGAAAATTTGCTGACATTGGTAATACAGTCAAATTGCAGTACTCTGCGGGTGTA  
TACAGAATAGCAGAATGGGCAGACATTACGAATGCACACGGTGTGGTGGGCCCAGGTATTGT  
TAGCGGTTTGAAGCAGGCGGCAGAAGAAGTAACAAAGGAACCTAGAGGCCTTTTGATGTTAG  
CAGAATTGTCATGCAAGGGCTCCCTATCTACTGGAGAATATACTAAGGGTACTGTTGACATT  
GCGAAGAGCGACAAAGATTTTGTATCGGCTTTATTGCTCAAAGAGACATGGGTGGAAGAGA  
TGAAGGTTACGATTGGTTGATTATGACACCCGGTGTGGGTTTAGATGACAAGGGAGACGCAT  
TGGGTCAACAGTATAGAACCGTGGATGATGTGGTCTCTACAGGATCTGACATTATTATTGTT  
GGAAGAGGACTATTTGCAAAGGGAAGGGATGCTAAGGTAGAGGGTGAACGTTACAGAAAAGC  
AGGCTGGGAAGCATATTTGAGAAGATGCGGCCAGCAAACGGTACCGCTAGTGGTTCTGCTG  
GTTCTGCGATTAACATGTCTAAAGGTGAAGAATTATTCAGTGGTGTGTTCCCAATTTTGGTT  
GAATTAGATGGTGATGTTAATGGTCACAAATTTTCTGTCTCCGGTGAAGGTGAAGGTGATGC  
TACTTACGGTAAATTGACCTTAAAATTTATTTGTACTACTGGTAAATTGCCAGTTCATGGC  
CAACCTTAGTCACTACTTTAACTTATGGTGTTCATGTTTTTTCTAGATAACCAGATCATATG  
AAACAACATGACTTTTTCAAGTCTGCCATGCCAGAAGGTTATGTTCAAGAAAGAACTATTTT  
TTTCAAAGATGACGGTAACTACAAGACCAGAGCTGAAGTCAAGTTTGAAGGTGATACCTTAG  
TTAATAGAATCGAATTAAGGTTATTGATTTTAAAGAAGATGGTAACATTTTAGGTCACAAA  
TTGGAATACAACATAACTCTCACAATGTTTACATCATGGCTGACAAACAAAAGAATGGTAT  
CAAAGTTAACTTCAAATTAGACACAACATTGAAGATGGTCTGTTCAATTAGCTGACCATT  
ATCAACAAAATACTCCAATTGGTGATGGTCCAGTCTTGTACCAGACAACCATTACTTATCC  
ACTCAATCTGCCTTATCCAAAGATCCAAACGAAAAGAGACCACATGGTCTTGTTAGAATT  
TGTTACTGCTGCTGGTATTACCCATGGTATTGATGAATTGTACAAATAAGGCGCGCC**ACTTC**  
**TAAATAAGCGAATTTCTTATGATTTATGATTTTTATTATTAATAAGTTATAAAAAAATAA**  
**GTGTATACAAATTTTAAAGTGACTCTTAGGTTTTAAACGAAAATTCCTTATTCTTGAGTAAC**

**TCTTTCCTGTAGGTCAGGTTGCTTCTCAGGTATAGTATGAGGTCGCTCTTATTGACCACAC  
CTCTACCGGCAGATCCGCTAGGGATAACAGGGTAATATAGATCTGTTAGCTTGCCTCGTCC  
CCGCCGGGTACCCCGCCAGCGACATGGAGGCCAGAATACCCTCCTTGACAGTCTTGACGT  
GCGCAGCTCAGGGGCATGATGTGACTGTGCCCCGTACATTTAGCCCATAACATCCCCATGTAT  
AATCATTGTCATCCATACATTTTGGATGGCCGCACGGCGCGAAGCAAAAATTACGGCTCCTCG  
CTGCAGACCTGCGAGCAGGGAAACGCTCCCCTCACAGACGCGTTGAATTGTCCCCACGCCGC  
GCCCCGTAGAGAAAATATAAAAGGTTAGGATTTGCCACTGAGGTTCTTCTTTCATATACTTC  
CTTTTAAAATCTTGCTAGGATACAGTTCTCACATCACATCCGAACATAAAACAACCATGGGTA  
GGAGGGCTTTTGTAGAAAGAAATACGAACGAAACGAAAATCAGCGTTGCCATCGCTTTGGAC  
AAAGCTCCCTTACCTGAAGAGTCGAATTTTATTGATGAACTTATAACTTCCAAGCATAACAA  
CCAAAAGGGAGAACAAGTAATCCAAGTAGACACGGGAATTGGATTCTTGATCACATGTATC  
ATGCACTGGCTAAACATGCAGGCTGGAGCTTACGACTTTACTCAAGAGGTGATTTAATCATC  
GATGATCATCACACTGCAGAAGATACTGCTATTGCACTTGGTATTGCATTCAAGCAGGCTAT  
GGAGTAACTTTGCCGGCGTTAAAAGATTTGGACATGCTTATTGTCCACTTGACGAAGCTCTT  
TCTAGAAGCGTAGTTGACTTGTGCGGACGGCCCTATGCTGTTATCGATTTGGGATTAAAGCG  
TGAAAAGGTTGGGGAATTGTCTGTGAAATGATCCCTCACTACTATATTCTTTTCGGTAG  
CAGCTGGAATTACTTTGCATGTTACCTGCTTATATGGTAGTAATGACCATCATCGTGTGAA  
AGCGCTTTTAAATCTCTGGCTGTTGCCATGCGCGGGCTACTAGTCTTACTGGAAGTTCTGA  
AGTCCCAAGCACGAAGGGAGTGTGTAAGAGTACTGACAATAAAAAGATTCTTGTTTTCAA  
GAACTTGTCAATTTGTATAGTTTTTTTTTATATTGTAGTTGTTCTATTTTAAATCAAATGTTAGCG  
TGATTTATATTTTTTTTTTCGCCTCGACATCATCTGCCAGATGCGAAGTTAAGTGCAGAAA  
GTAATATCATGCGTCAATCGTATGTGAATGCTGGTCGCTATACTGCTGTGATTGATACTA  
ACGCCGCCATCCAGTTTAAACGAGCTCCATGTGGTTGCCCTTACGCCGACTACGGATCCATGC  
ATGCGAGAATTCAAATGGCGTTATTGGTGTGATGTAAGCGGAGGTGTGGAGACAAATGGTG  
TAAAAGACTCTAACAGCTAGCGCCGGCGGTACC 3'**

Fragment of pMA vector (residues 3814 – 6183 from TRP-URA vector):

5' ttaattaatggagcacaagactggcctcatgggccttcgctcactgcccgctttccagt  
cgggaaacctgtcgtgccagctgcattaacatggtcatagetgtttccttgcgatattgggcg  
ctctccgcttcctcgtcactgactcgtcgcgctcggtcggtcgggtaaaagcctgggggtgc  
taatgagcaaaaggccagcaaaaggccaggaaccgtaaaaaggccgcttgctggcgTTTT  
ccataggctccgccccctgacgagcatcacaaaaatcgacgctcaagtcagaggtggcgaa  
accgacaggactataaagataaccaggcgtttccccctggaagctccctcgtgcgctctcct  
gttccgacctgcccgttaccggataacctgtccgcctttctcccttcgggaagcgtggcgct  
ttctcatagctcacgctgtaggtatctcagttcgggtgtaggtcgttcgctccaagctgggct  
gtgtgcacgaacccccggttcagcccagccgctgcgccttatccggtaactatcgtcttgag  
tccaacccggttaagacacgacttatcgccactggcagcagccactggtaacaggattagcag  
agcgaggtatgtaggcggtgctacagagttcttgaagtgggtggcctaactacggctacacta  
gaagaacagtatttggtatctgcgctctgctgaagccagttaccttcggaaaaagagttggt  
agctcttgatccggcaaaaccaccgctggtagcggtggtTTTTTTTgTTTgcaagcagca  
gattacgcgcagaaaaaaaggatctcaagaagatcctttgatcttttctacggggtctgacg  
ctcagtggaacgaaaactcacgttaagggattttggtcatgagattatcaaaaaggatcttc  
acctagatccttttaaattaaaaatgaagttttaaataatctaaagtatatatgagtaaac  
ttggtctgacagttaccaatgcttaatcagtgaggcacctatctcagcgatctgtctatctc  
gttcatccatagttgcctgactccccgctcgtgtagataactacgatacgggagggcttacca  
tctggccccagtgctgcaatgataccgcgagaaccacgctcaccggctccagatttatcagc  
aataaaccagccagccggaaggccgagcgcagaagtggctcctgcaactttatccgcctcca  
tccagctctattaattggtgcccgggaagctagagtaagtagttcggcagttaatagtttgcgc

aacgttggtgccattgctacagggcatcgtggtgtcacgctcgtcgtttgggatggcttcatt  
cagctccgggttcccaacgatcaaggcgagttacatgatccccatggttgcaaaaaagcgg  
ttagctccttcggctcctccgatcgttgtcagaagtaagttggccgcagtggtatcactcatg  
gttatggcagcactgcataattctcttactgtcatgccatccgtaagatgcttttctgtgac  
tggtagtactcaaccaagtcattctgagaatagtgtatgcgggcgaccgagttgctcttgcc  
cggcgtcaatacgggataataccgcgccacatagcagaactttaaagtgctcatcattgga  
aaacgttcttcggggcgaaaactctcaaggatcttaccgctggtgagatccagttcgatgta  
accactcgtgcacccaactgatcttcagcatctttactttcaccagcgtttctgggtgag  
caaaaacaggaaggcaaaatgccgcaaaaaagggaataagggcgacacggaaatggtgaata  
ctcactactcttctttttcaatattattgaagcatttatcagggttattgtctcatgagcgg  
atacatatttgatgtatttagaaaaataaacaataggggttccgcgcacatttccccgaa  
aagtgccacctaattgtaagcgttaatattttgttaaatttcgcgttaaattttgttaa  
tcagctcattttttaaccaataggccgaaatcggcaaaatcccttataaatcaaaagaatag  
accgagataggggttgagtggccgctacagggcgctcccattcgcattcaggctgcgcaact  
ggtgggaagggcgtttcgggtgcgggcctcttcgctattacgccagctggcgaaagggggatg  
tgctgcaagggcattaagttgggtaacgccaggggtttccagtcacgacgttgtaaaacga  
cggccagtgagcgcgacgtaatacgaactcactatagggcgaattggcgggaaggccgtcaagg  
ccacgtgtcttgcca 3'

#### Fragment of TRP-URA-AB

Linker of 12 amino acids (GGSSANGTSGASG) (Supplemental Experimental Procedures) and fragment of A $\beta$  was added between GFP and the TEF terminator. Insertion site after residue 2152 of TRP-URA vector (uppercase Linker 2 and bold A $\beta$ 42 sequence):

5' GGTGGAAGTGCTAATGGTACTTCTGGTGCTAGTGGT**gatgctgaatttagacatgattct  
ggttatgaagttcatcatcaaaaattggtcttttttgctgaagatggttggttctaataaagg  
tgctattattggtttgatgggtgggtggtggttattgct** 3'

#### Sequences of the primers used

Primers for qPCR, to monitor the competition assay:

solF: TCCAAACGAAAAGAGAGACCACA

solR: AGTGGCGCGCCTTATTTGTA

aggF: TGGTGCTAGTGGTGATGCTG

aggR: AGAACCAACATCTTCAGCAAAAA

Primers to measure the production of transcripts:

FmRNA: TAGTCACTACTTTAACTTATGGTGTTCAA

RmRNA: CTTTCTTGAACATAACCTTCTGGC

**Appendix Table S1. List of data measured for each strain, growth media and environment.**

| Media | Envt.                         | S <sup>a</sup> | SEM       | FOCI rate <sup>b</sup> | F <sub>FOCIagg</sub> <sup>c</sup> | F <sub>CYTOagg</sub> <sup>d</sup> | F <sub>TOTALagg</sub> <sup>e</sup> | F <sub>TOTALsol</sub> <sup>f</sup> | $\frac{F_{FOCIagg}}{F_{TOTALagg}}$ | $\frac{F_{CYTOagg}}{F_{TOTALsol}}$ | Coeff. <sup>g</sup> |
|-------|-------------------------------|----------------|-----------|------------------------|-----------------------------------|-----------------------------------|------------------------------------|------------------------------------|------------------------------------|------------------------------------|---------------------|
| 5FOA  | Sorbitol                      | 0.013          | ±6.29E-04 | 0.708                  | 5042                              | 9613                              | 14655                              | 51114                              | 0.344                              | 0.188                              | 0.091               |
|       | Proline                       | 0.007          | ±2.82E-04 | 0.478                  | 1703                              | 7377                              | 9080                               | 27854                              | 0.188                              | 0.265                              | 0.027               |
|       | NaCl                          | 0.006          | ±2.08E-04 | 0.308                  | 1917                              | 5791                              | 7708                               | 31935                              | 0.249                              | 0.181                              | 0.019               |
|       | H <sub>2</sub> O <sub>2</sub> | 0.028          | ±1.38E-03 | 0.681                  | 2869                              | 5567                              | 8436                               | 33762                              | 0.340                              | 0.165                              | 0.156               |
|       | DTT                           | 0.022          | ±1.01E-03 | 0.705                  | 3989                              | 5183                              | 9172                               | 31855                              | 0.435                              | 0.163                              | 0.151               |
|       | 37°C                          | -              | -         | 0.63                   | -                                 | 1411                              | 1704                               | 18688                              | -                                  | 0.075                              | -                   |
|       | 30°C                          | 0.055          | ±2.71E-03 | 0.584                  | 2893                              | 5854                              | 8746                               | 31595                              | 0.331                              | 0.185                              | 0.285               |
|       | 25°C                          | 0.002          | ±6.46E-05 | 0.884                  | 5370                              | 4766                              | 10136                              | 32962                              | 0.530                              | 0.145                              | 0.061               |
| -URA  | Sorbitol                      | -0.003         | ±6.14E-05 | 0.676                  | 2445                              | 5584                              | 8029                               | 27919                              | 0.305                              | 0.2                                | -0.013              |
|       | Proline                       | -0.004         | ±2.08E-04 | 0.579                  | 1186                              | 4487                              | 5673                               | 9850                               | 0.209                              | 0.456                              | -0.009              |
|       | NaCl                          | -0.004         | ±1.76E-04 | 0.297                  | 606                               | 3398                              | 4005                               | 23828                              | 0.151                              | 0.143                              | -0.029              |
|       | H <sub>2</sub> O <sub>2</sub> | -0.010         | ±5.23E-04 | 0.247                  | 477                               | 3471                              | 3949                               | 24096                              | 0.121                              | 0.144                              | -0.073              |
|       | DTT                           | -0.007         | ±2.86E-04 | 0.197                  | 490                               | 3296                              | 3786                               | 17186                              | 0.129                              | 0.192                              | -0.034              |
|       | 37°C                          | -0.103         | ±5.08E-03 | 0.689                  | 2660                              | 2990                              | 5650                               | 11737                              | 0.471                              | 0.071                              | -0.403              |
|       | 30°C                          | -0.045         | ±2.19E-03 | 0.477                  | 691                               | 3183                              | 3874                               | 18281                              | 0.178                              | 0.174                              | -0.258              |
|       | 25°C                          | -0.01          | ±4.65E-04 | 0.301                  | 1107                              | 4893                              | 6001                               | 16015                              | 0.184                              | 0.306                              | -0.031              |
| +URA  | Sorbitol                      | -0.005         | ±2.36E-04 | 0.865                  | 5773                              | 6559                              | 12332                              | 44318                              | 0.468                              | 0.148                              | -0.011              |
|       | Proline                       | -0.001         | ±4.26E-05 | 0.471                  | 1323                              | 4491                              | 5814                               | 24718                              | 0.228                              | 0.182                              | -0.002              |
|       | NaCl                          | 0.003          | ±8.17E-05 | 0.707                  | 2413                              | 6462                              | 8874                               | 38575                              | 0.272                              | 0.168                              | 0.01                |
|       | H <sub>2</sub> O <sub>2</sub> | 0.002          | ±2.77E-05 | 0.71                   | 2961                              | 5291                              | 8252                               | 42580                              | 0.359                              | 0.124                              | 0.007               |
|       | DTT                           | -0.001         | ±1.63E-05 | 0.321                  | 579                               | 3022                              | 3601                               | 31586                              | 0.161                              | 0.096                              | -0.007              |
|       | 37°C                          | 0.001          | ±2.56E-05 | 0.578                  | 1360                              | 2885                              | 4245                               | 9008                               | 0.320                              | 0.091                              | 0.002               |
|       | 30°C                          | 0.002          | ±7.36E-05 | 0.733                  | 2853                              | 5908                              | 8762                               | 29966                              | 0.326                              | 0.197                              | 0.006               |
|       | 25°C                          | -0.005         | ±1.38E-04 | 0.886                  | 4209                              | 7049                              | 11258                              | 34907                              | 0.374                              | 0.202                              | -0.012              |

$$S = \frac{1}{\log_2 e} (\varpi_{agg} - \varpi_{sol})$$

a. Selection coefficient is calculated as

b. Ratio of cells with foci in that population.

c. Average fluorescence intensity emitted by a foci in the URA3<sub>agg</sub> population. This is calculated as:

$$FOCI_{agg} \cdot FOCI_{rate}$$

where FOCI<sub>agg</sub> is the average fluorescence intensity emitted by a foci taking into account only the fraction of URA3<sub>agg</sub> population containing foci, and the FOCI<sub>rate</sub> is the ratio of cells containing foci.

d. Average fluorescence intensity emitted by the cytoplasm of the URA3<sub>agg</sub> population. This is calculated as:

$$F_{CYTOagg} = F_{TOTALagg} - F_{FOCIagg}$$

e. F<sub>TOTALagg</sub> is the average of the total fluorescence emitted by URA3<sub>agg</sub> population.

f. Average fluorescence intensity emitted by the URA3<sub>sol</sub> population.

g. Coefficient of proportionality (i.e. magnitude of effect) defined by the growth conditions. It indicates how the growth conditions influences the magnitude of a particular effect ( $\alpha$ , for deposit formation (+URA);  $\beta$  for loss of function (-URA);  $\gamma$  for gain of protective effect (+5FOA)).

**Appendix Table S2. List of doubling times measured for each strain, growth media and environment.**

|                               | -URA (essential) |           | +URA (non-essential) |           | +5FOA (toxic) |           |
|-------------------------------|------------------|-----------|----------------------|-----------|---------------|-----------|
|                               | URA3agg          | URA3sol   | URA3agg              | URA3sol   | URA3agg       | URA3sol   |
| 30°C                          | 3.42±0.65        | 2.91±0.13 | 2.85±0.08            | 2.77±0.16 | 4.96±0.20     | 5.20±0.62 |
| Proline                       | 2.95±0.01        | 2.90±0.04 | 2.89±0.03            | 2.86±0.02 | 4.84±0.11     | 3.86±0.01 |
| NaCl                          | 3.24±0.05        | 3.17±0.02 | 3.15±0.01            | 3.12±0.09 | 5.39±0.20     | 4.76±0.07 |
| Sorbitol                      | 4.34±0.19        | 4.51±0.06 | 4.14±0.16            | 4.13±0.08 | 9.15±1.61     | 6.55±0.46 |
| H <sub>2</sub> O <sub>2</sub> | 3.42±0.09        | 2.70±0.00 | 2.79±0.02            | 2.78±0.05 | 5.04±0.00     | 5.48±0.31 |
| DTT                           | 2.93±0.12        | 2.87±0.01 | 2.78±0.02            | 2.83±0.03 | 5.62±0.17     | 5.20±0.04 |
| 37°C                          | -                | 6.26±0.01 | 2.68±0.03            | 2.64±0.01 | 3.02±0.16     | 7.21±0.66 |
| 25°C                          | 4.43±0.14        | 4.00±0.21 | 4.21±0.22            | 4.03±0.21 | 6.06±0.11     | 6.69±0.00 |

Doubling times calculated from the growth curve obtained by following the turbidity (OD600nm) and fluorescence (450 nm excitation & 510 nm emission) during 72 hours with a Tecan Infinite M200 Pro. Here we show the average doubling time value from two independent experiments. Time measured in hours.

**Appendix Table S3. Time required to reach 50% of the population in (simulated) alternating environments.**

| Environment 1 |     | Environment 2 |      | Selection coefficient of the history of environments ( $S_h$ ) | Time (in generations) to reach 50% of the population |
|---------------|-----|---------------|------|----------------------------------------------------------------|------------------------------------------------------|
| H2O2          | FOA | 30            | FOA  | 0.0415                                                         | 126                                                  |
| DTT           | FOA | 30            | FOA  | 0.0385                                                         | 136                                                  |
| Sorbitol      | FOA | 30            | FOA  | 0.0340                                                         | 154                                                  |
| Proline       | FOA | 30            | FOA  | 0.0310                                                         | 169                                                  |
| NaCl          | FOA | 30            | FOA  | 0.0305                                                         | 171                                                  |
| 30            | FOA | NaCl          | URA+ | 0.0290                                                         | 179                                                  |
| 30            | FOA | 25            | FOA  | 0.0285                                                         | 185                                                  |
| 30            | FOA | H2O2          | URA+ | 0.0285                                                         | 185                                                  |
| 30            | FOA | 30            | URA+ | 0.0285                                                         | 185                                                  |
| 30            | FOA | 37            | URA+ | 0.0280                                                         | 187                                                  |
| 30            | FOA | DTT           | URA+ | 0.0270                                                         | 195                                                  |
| 30            | FOA | Proline       | URA+ | 0.0270                                                         | 195                                                  |
| 30            | FOA | Sorbitol      | URA- | 0.0260                                                         | 203                                                  |
| 30            | FOA | Proline       | URA- | 0.0255                                                         | 205                                                  |
| 30            | FOA | NaCl          | URA- | 0.0255                                                         | 205                                                  |
| 30            | FOA | Sorbitol      | URA+ | 0.0250                                                         | 212                                                  |
| 30            | FOA | 25            | URA+ | 0.0250                                                         | 212                                                  |
| H2O2          | FOA | DTT           | FOA  | 0.0250                                                         | 209                                                  |
| 30            | FOA | DTT           | URA- | 0.0240                                                         | 216                                                  |
| 30            | FOA | H2O2          | URA- | 0.0225                                                         | 232                                                  |
| 30            | FOA | 25            | URA- | 0.0225                                                         | 232                                                  |
| Sorbitol      | FOA | H2O2          | FOA  | 0.0205                                                         | 255                                                  |
| Proline       | FOA | H2O2          | FOA  | 0.0175                                                         | 299                                                  |
| Sorbitol      | FOA | DTT           | FOA  | 0.0175                                                         | 298                                                  |
| NaCl          | FOA | H2O2          | FOA  | 0.0170                                                         | 308                                                  |
| H2O2          | FOA | NaCl          | URA+ | 0.0155                                                         | 339                                                  |
| H2O2          | FOA | 25            | FOA  | 0.0150                                                         | 350                                                  |
| H2O2          | FOA | H2O2          | URA+ | 0.0150                                                         | 350                                                  |
| H2O2          | FOA | 30            | URA+ | 0.0150                                                         | 349                                                  |
| Proline       | FOA | DTT           | FOA  | 0.0145                                                         | 360                                                  |
| H2O2          | FOA | 37            | URA+ | 0.0145                                                         | 360                                                  |
| NaCl          | FOA | DTT           | FOA  | 0.0140                                                         | 375                                                  |
| H2O2          | FOA | DTT           | URA+ | 0.0135                                                         | 387                                                  |
| H2O2          | FOA | Proline       | URA+ | 0.0135                                                         | 387                                                  |
| DTT           | FOA | NaCl          | URA+ | 0.0125                                                         | 420                                                  |
| H2O2          | FOA | Sorbitol      | URA- | 0.0125                                                         | 416                                                  |
| H2O2          | FOA | Proline       | URA- | 0.0120                                                         | 439                                                  |
| H2O2          | FOA | NaCl          | URA- | 0.0120                                                         | 439                                                  |
| DTT           | FOA | H2O2          | URA+ | 0.0120                                                         | 437                                                  |



---

|          |     |          |      |        |      |
|----------|-----|----------|------|--------|------|
| DTT      | FOA | 25       | FOA  | 0.0120 | 436  |
| DTT      | FOA | 30       | URA+ | 0.0120 | 436  |
| DTT      | FOA | 37       | URA+ | 0.0115 | 457  |
| H2O2     | FOA | Sorbitol | URA+ | 0.0115 | 455  |
| H2O2     | FOA | 25       | URA+ | 0.0115 | 455  |
| DTT      | FOA | DTT      | URA+ | 0.0105 | 497  |
| DTT      | FOA | Proline  | URA+ | 0.0105 | 497  |
| H2O2     | FOA | DTT      | URA- | 0.0105 | 496  |
| Sorbitol | FOA | Proline  | FOA  | 0.0100 | 520  |
| DTT      | FOA | Sorbitol | URA- | 0.0095 | 550  |
| Sorbitol | FOA | NaCl     | FOA  | 0.0095 | 547  |
| DTT      | FOA | Proline  | URA- | 0.0090 | 585  |
| DTT      | FOA | NaCl     | URA- | 0.0090 | 585  |
| H2O2     | FOA | H2O2     | URA- | 0.0090 | 579  |
| H2O2     | FOA | 25       | URA- | 0.0090 | 579  |
| DTT      | FOA | Sorbitol | URA+ | 0.0085 | 614  |
| DTT      | FOA | 25       | URA+ | 0.0085 | 614  |
| Sorbitol | FOA | NaCl     | URA+ | 0.0080 | 649  |
| DTT      | FOA | DTT      | URA- | 0.0075 | 696  |
| Sorbitol | FOA | H2O2     | URA+ | 0.0075 | 693  |
| Sorbitol | FOA | 25       | FOA  | 0.0075 | 692  |
| Sorbitol | FOA | 30       | URA+ | 0.0075 | 691  |
| Sorbitol | FOA | 37       | URA+ | 0.0070 | 740  |
| Proline  | FOA | NaCl     | FOA  | 0.0065 | 805  |
| DTT      | FOA | H2O2     | URA- | 0.0060 | 873  |
| DTT      | FOA | 25       | URA- | 0.0060 | 869  |
| Sorbitol | FOA | DTT      | URA+ | 0.0060 | 867  |
| Sorbitol | FOA | Proline  | URA+ | 0.0060 | 860  |
| Proline  | FOA | NaCl     | URA+ | 0.0050 | 1046 |
| 30       | FOA | 30       | URA- | 0.0050 | 1029 |
| Sorbitol | FOA | Sorbitol | URA- | 0.0050 | 1024 |
| NaCl     | FOA | NaCl     | URA+ | 0.0045 | 1164 |
| Proline  | FOA | H2O2     | URA+ | 0.0045 | 1163 |
| Proline  | FOA | 25       | FOA  | 0.0045 | 1162 |
| Proline  | FOA | 30       | URA+ | 0.0045 | 1161 |
| Sorbitol | FOA | Proline  | URA- | 0.0045 | 1150 |
| Sorbitol | FOA | NaCl     | URA- | 0.0045 | 1150 |
| NaCl     | FOA | H2O2     | URA+ | 0.0040 | 1311 |
| NaCl     | FOA | 25       | FOA  | 0.0040 | 1309 |
| NaCl     | FOA | 30       | URA+ | 0.0040 | 1308 |
| Proline  | FOA | 37       | URA+ | 0.0040 | 1305 |
| Sorbitol | FOA | Sorbitol | URA+ | 0.0040 | 1283 |
| Sorbitol | FOA | 25       | URA+ | 0.0040 | 1279 |

---

---

|          |      |          |      |        |       |
|----------|------|----------|------|--------|-------|
| NaCl     | FOA  | 37       | URA+ | 0.0035 | 1494  |
| Proline  | FOA  | DTT      | URA+ | 0.0030 | 1752  |
| Proline  | FOA  | Proline  | URA+ | 0.0030 | 1734  |
| Sorbitol | FOA  | DTT      | URA- | 0.0030 | 1693  |
| NaCl     | FOA  | DTT      | URA+ | 0.0025 | 2113  |
| NaCl     | URA+ | H2O2     | URA+ | 0.0025 | 2100  |
| 25       | FOA  | NaCl     | URA+ | 0.0025 | 2095  |
| NaCl     | URA+ | 30       | URA+ | 0.0025 | 2093  |
| NaCl     | FOA  | Proline  | URA+ | 0.0025 | 2086  |
| 25       | FOA  | H2O2     | URA+ | 0.0020 | 2625  |
| H2O2     | URA+ | 30       | URA+ | 0.0020 | 2622  |
| 25       | FOA  | 30       | URA+ | 0.0020 | 2614  |
| NaCl     | URA+ | 37       | URA+ | 0.0020 | 2612  |
| Proline  | FOA  | Sorbitol | URA- | 0.0020 | 2578  |
| Proline  | FOA  | Proline  | URA- | 0.0015 | 3537  |
| Proline  | FOA  | NaCl     | URA- | 0.0015 | 3529  |
| H2O2     | URA+ | 37       | URA+ | 0.0015 | 3492  |
| 25       | FOA  | 37       | URA+ | 0.0015 | 3477  |
| 37       | URA+ | 30       | URA+ | 0.0015 | 3472  |
| NaCl     | FOA  | Sorbitol | URA- | 0.0015 | 3436  |
| Sorbitol | FOA  | H2O2     | URA- | 0.0015 | 3333  |
| Sorbitol | FOA  | 25       | URA- | 0.0015 | 3320  |
| NaCl     | FOA  | Proline  | URA- | 0.0010 | 5365  |
| NaCl     | FOA  | NaCl     | URA- | 0.0010 | 5360  |
| NaCl     | URA+ | DTT      | URA+ | 0.0010 | 5351  |
| Proline  | FOA  | Sorbitol | URA+ | 0.0010 | 5197  |
| Proline  | URA+ | NaCl     | URA+ | 0.0010 | 5188  |
| Proline  | FOA  | 25       | URA+ | 0.0010 | 5133  |
| H2O2     | URA+ | DTT      | URA+ | 0.0005 | 11065 |
| 25       | FOA  | DTT      | URA+ | 0.0005 | 10928 |
| DTT      | URA+ | 30       | URA+ | 0.0005 | 10874 |
| NaCl     | FOA  | Sorbitol | URA+ | 0.0005 | 10443 |
| Proline  | URA+ | H2O2     | URA+ | 0.0005 | 10400 |
| 25       | FOA  | Proline  | URA+ | 0.0005 | 10274 |
| Proline  | URA+ | 30       | URA+ | 0.0005 | 10228 |
| NaCl     | FOA  | 25       | URA+ | 0.0005 | 10188 |

---

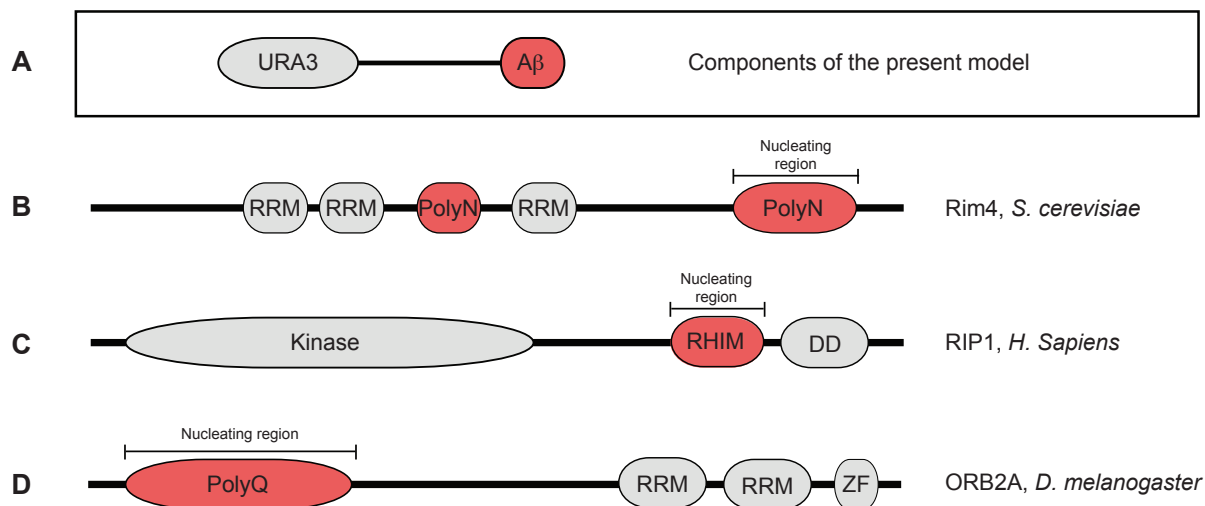

**Appendix Figure S1. Domain organization of proteins that can undergo phase separation and form functional deposits *in vivo*.**

**A.** The protein model for the current work has been designed to have a domain with a defined biochemical activity in the cell (enzymatic domain; URA3; grey) and a region that drives phase separation by simple coacervation ( $A\beta$ ). Nature has selected for proteins with functions and properties separated into specific domains/regions. Here we present three natural proteins that phase separates by simple coacervation and contain spatially separated functional domains.

**B.** RIM4 represses several mRNAs capturing them in intracellular deposits. Rim4 aggregation is driven by a domain rich in Asparagines (polyN) and is independent of the presence of RNA presence (Berchowitz et al, 2015).

**C.** RIP1 and RIP3 are kinases that interact through a common region, the RIP homotypic interaction motif (RHIM). RHIM region drives the formation of amyloid deposits. *In vivo* RIP1 and RIP3 form a heterodimeric amyloid structure that mediates programmed necrosis (Li et al, 2012).

**D.** ORB2A is an isoform of ORB2, an orthologue of CPEB. ORB2A is crucial for the formation of ORB2 amyloid oligomers and the persistence of long-term memory (Khan et al, 2015).

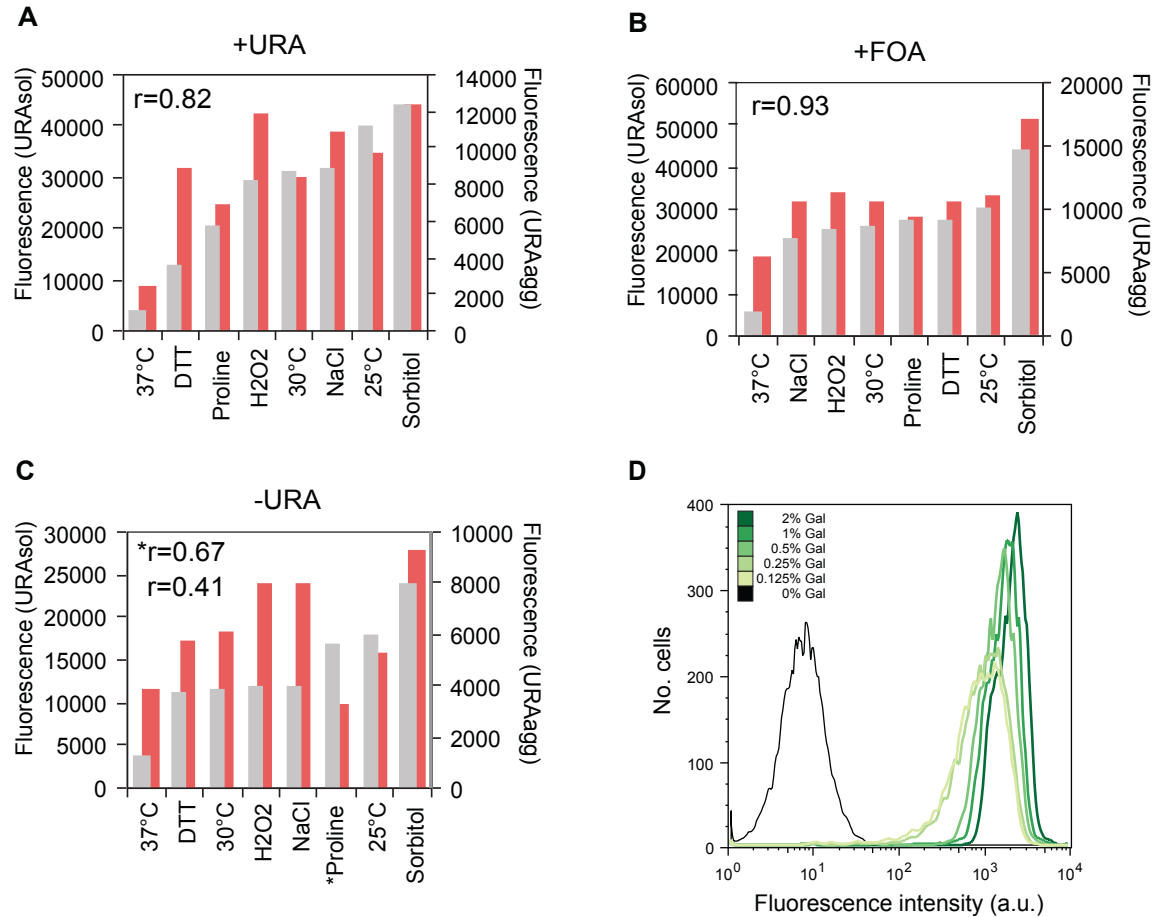

**Appendix Figure S2. Variation in fluorescence depending on the strain and the concentration of inducer.**

Fluorescence average (arbitrary units) of the URA<sub>3agg</sub> (red,  $F_{TOTALsol}$ ) and URA<sub>3sol</sub> (grey,  $F_{TOTALagg}$ ) populations grown at 30°C and in media with **A**, uracil, **B**, 5FOA or **C**, without uracil. Pearson's correlation coefficient,  $r$ , is shown in each panel. Data is arranged from smaller to larger URA<sub>3agg</sub> fluorescence values for each media composition. \*Correlation coefficient obtained without the Proline environmental condition. Note: Although both strains (URA<sub>3agg</sub> and URA<sub>3sol</sub>) present similar transcript levels (**Figure EV2**), due to deposit formation, a part of the translated Ura<sub>3pagg</sub> can be rapidly removed through autophagy or other mechanisms (Sanchez de Groot et al, 2015; Villar-Pique & Ventura, 2013) and hence may lead to a reduction in  $F_{TOTALagg}$  with respect to  $F_{TOTALsol}$  (Sanchez de Groot et al, 2015; Villar-Pique & Ventura, 2013) (**Methods**).

**D.** Distribution of URA<sub>3sol</sub> cells in terms of their total fluorescence after 20h of growth in different galactose concentrations. Each sample was centrifuged and suspended in PBS. The samples were vortexed for 1 min before measuring the fluorescence loss using a BD LSR II flow cytometer system (BD Biosciences). 10000 cells were counted at a maximum flow rate of 600 events per second. GFP fluorescence was measured using a 488 nm laser for excitation and a 525/50 nm band pass filter.

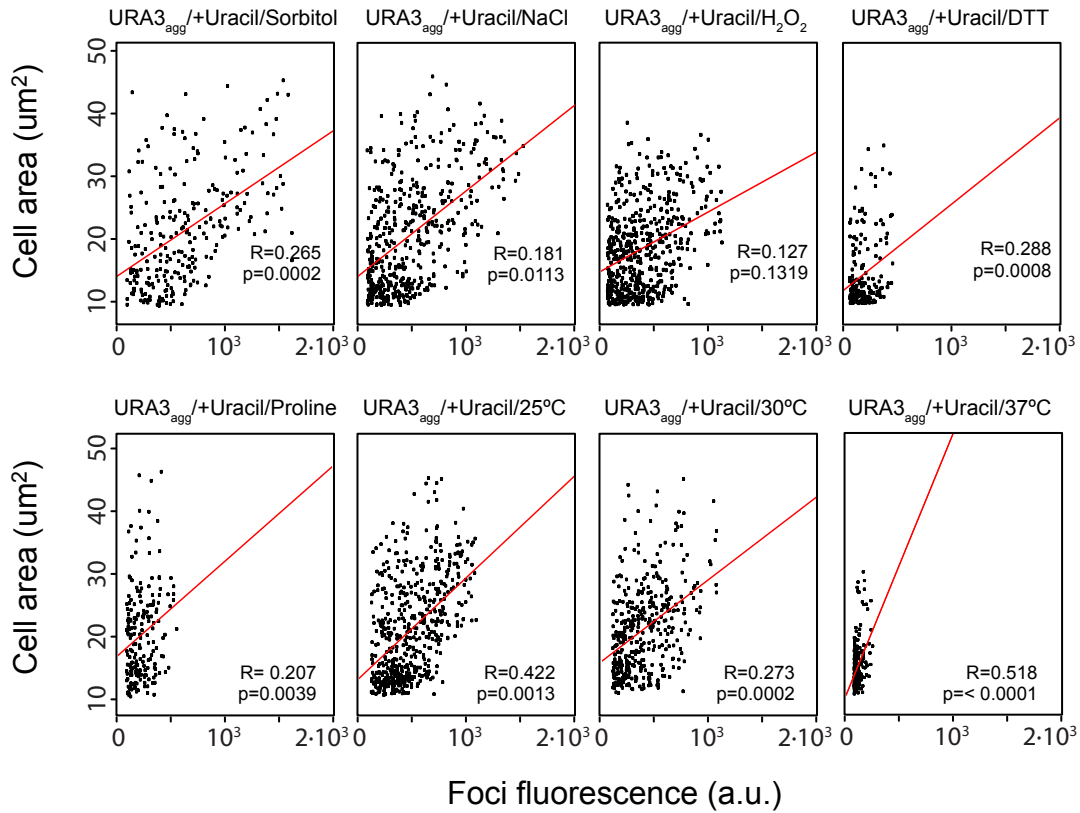

**Appendix Figure S3. Cell area vs. foci size distribution for URA3<sub>agg</sub> cells grown in different environments when Ura3p is non-essential (+URA).**

Scatter plots showing the relationship between the foci size and the cell area of the URA3<sub>agg</sub> population in a medium containing uracil (+URA). The environments are shown above. R denotes the Pearson's correlation coefficient. P-values for the correlation coefficient were measured using the R statistical package.

## Appendix References

Berchowitz LE, Kabachinski G, Walker MR, Carlile TM, Gilbert WV, Schwartz TU, Amon A (2015) Regulated Formation of an Amyloid-like Translational Repressor Governs Gametogenesis. *Cell* **163**: 406-418

Kaganovich D, Kopito R, Frydman J (2008) Misfolded proteins partition between two distinct quality control compartments. *Nature* **454**: 1088-1095

Khan MR, Li L, Perez-Sanchez C, Saraf A, Florens L, Slaughter BD, Unruh JR, Si K (2015) Amyloidogenic Oligomerization Transforms *Drosophila* Orb2 from a Translation Repressor to an Activator. *Cell* **163**: 1468-1483

Li J, McQuade T, Siemer AB, Napetschnig J, Moriwaki K, Hsiao YS, Damko E, Moquin D, Walz T, McDermott A, Chan FK, Wu H (2012) The RIP1/RIP3 necrosome forms a functional amyloid signaling complex required for programmed necrosis. *Cell* **150**: 339-350

Sanchez de Groot N, Gomes RA, Villar-Pique A, Babu MM, Coelho AV, Ventura S (2015) Proteome response at the edge of protein aggregation. *Open Biol* **5**: 140221

Teste MA, Duquenne M, Francois JM, Parrou JL (2009) Validation of reference genes for quantitative expression analysis by real-time RT-PCR in *Saccharomyces cerevisiae*. *BMC Mol Biol* **10**: 99

Villar-Pique A, Ventura S (2013) Protein aggregation propensity is a crucial determinant of intracellular inclusion formation and quality control degradation. *Biochim Biophys Acta* **1833**: 2714-2724
